# Supplementary material for: Experimental Infection of Domestic Pigs (Sus scrofa) with Rift Valley Fever Virus
Source: MDPI journal article supplement (doi:10.3390/v15020545), 2023-02-16
Supplement: s1 [file s1]

## Supplementary Materials

| Northern corridor |                                                                                                                                      |                  |                                                                                                                                                                   |                  |
|-------------------|--------------------------------------------------------------------------------------------------------------------------------------|------------------|-------------------------------------------------------------------------------------------------------------------------------------------------------------------|------------------|
| Western corridor  | <b>Group 2 - Stable D (M21/10 vv)</b><br><br>W1D, W2D*, W3D<br>W4D, W5D, W6D<br>W7D, W8D and W9D<br><br>E1D* and E2D*<br>L1D and L2D | Central corridor | <b>Group 2 - Stable C (M21/10 vv)</b><br>PS1C; PS2C, PS3C and PS4C<br><br>LS1C* and LS2C*<br>SP1C, SP2C, SP3C*<br>SP4C*, SP5C, SP6C<br>SP7C, SP8C, SP9C and SP10C | Eastern corridor |
|                   | Stable                                                                                                                               |                  | Stable                                                                                                                                                            |                  |
|                   | <b>Group 1 - Stable B (M66/09 vv)</b><br>W1B, W2B, W3B, W4B, W5B, W6B, W7B, W8B and W9B*<br><br>E1B* and E2B*<br>L1B and L2B         |                  | <b>Group 3 - Stable E (M66/09 and M21/10vv)</b><br>W1E*, W2E, W3E, W4E, W5E, W6E, W7E* and W8E*<br>W9E<br><br>E1E*, E2E*, E3E* and E4E*<br>L1E, L2E, L3E and L4E  |                  |
|                   | Stable                                                                                                                               |                  | <b>Group 1 - Stable A (M66/09 vv)</b><br>PS1A, PS2A, PS3A<br>PS4A and PS5A<br><br>LS1A*<br>SP1A, SP2A, SP3A<br>SP4A, SP5A*, SP6A<br>SP7A, SP8A, SP9A* and SP10A   |                  |
|                   | Cold room                                                                                                                            |                  | Post mortem hall                                                                                                                                                  |                  |

**Figure S1:** Schematic diagram of the stables in which the experimental animals were housed. Movement was from stables A to B, followed by C to D, then E, using the eastern, western, and northern corridors. The central corridor was used to take dead animals to the post mortem hall or cold room. Proper biosafety and biosecurity procedures were followed and PPE was used for

personnel safety and avoidance of cross contamination. Virus 1 (M66/09 variant) and virus 2 (M21/10 variant) were used to inoculate animals in groups 1 (stables A and B) and 2 (stables C and D) respectively, whereas group 3 animals (stable E) were either inoculated with virus 1 (W2E and W5E) or virus 2 (W4E and W6E) or with a mixture of the two viruses (L1E, L2E, L3E and L4E, and W3E, W8E and W9E). The control piglets and weaners were mock inoculated with TC medium and the ewes and lactating sows received no treatment. The stable codes constituted the animal identity suffixes

**Table S1** Laboratory test results of group 1 animals. Only blood and swab pools of animals that demonstrated antibody presence on ELISA were tested on real time RT-PCR (newborn piglets were not swabbed). For blood, swab pools and sera, a negative result represents a collection of negative results of all the samples tested for the particular animal

| Animal   | Real time RT-PCR  |             |                               | Conventional RT-PCR     | ELISA                 |
|----------|-------------------|-------------|-------------------------------|-------------------------|-----------------------|
|          | Organ pool (DPI)  | Blood (DPI) | Oronasorectal swab pool (DPI) | Tissue culture material | Serum (DPI)           |
| PS1A     | -                 | -           | + (3; 4)                      | +                       | + (21; 28; 61)        |
| PS2A     | -                 | -           | + (2; 4)                      | +                       | Susp (14); + (21; 28) |
| PS3A     | -                 | -           | -                             | +                       | Susp (21); + (28)     |
| PS4A     | -                 | -           | -                             | -                       | + (14; 21)            |
| PS5A     | -                 | -           | -                             | +                       | + (13; 14)            |
| PS2A-P1  | + (23)            | -           | N/A                           | NT                      | NT                    |
| PS2A-P2  | -                 | -           | N/A                           | -                       | NT                    |
| PS2A-P3  | + (23)            | -           | N/A                           | -                       | Susp (23)             |
| PS2A-P4  | + (23)            | -           | N/A                           | -                       | Susp (23)             |
| PS2A-P5  | -                 | -           | N/A                           | -                       | Susp (23)             |
| PS2A-P6  | + (23)            | -           | N/A                           | -                       | -                     |
| PS2A-P7  | -                 | -           | N/A                           | -                       | Susp (23)             |
| PS2A-P8  | -                 | -           | N/A                           | +                       | -                     |
| PS2A-P9  | -                 | -           | N/A                           | -                       | Susp (23)             |
| PS2A-P10 | + (23)            | -           | N/A                           | +                       | -                     |
| PS2A-P11 | + (23)            | -           | N/A                           | +                       | -                     |
| PS2A-P12 | + (23)            | -           | N/A                           | +                       | -                     |
| PS2A-P13 | -                 | -           | N/A                           | -                       | Susp (23)             |
| PS2A-P14 | -                 | -           | N/A                           | -                       | -                     |
| PS2A-P15 | -                 | -           | N/A                           | +                       | NT                    |
| PS3A-P1  | -                 | -           | N/A                           | -                       | Susp (28)             |
| PS3A-P2  | N/A               | -           | N/A                           | NT                      | + (28)                |
| Animal   | Real Time RT-PCR  |             |                               | Conventional RT-PCR     | ELISA                 |
|          | Organ pool (DEPI) | Blood (DPI) | Oronasorectal swab pool (DPI) | Tissue culture material | Serum (DPI)           |
| PS3A-P3  | -                 | -           | N/A                           | -                       | + (28)                |
| PS3A-P4  | -                 | -           | N/A                           | +                       | + (28)                |
| PS3A-P5  | + (28)            | -           | N/A                           | +                       | + (28)                |
| PS3A-P6  | -                 | -           | N/A                           | -                       | + (28)                |
| PS3A-P7  | + (28)            | + (28)      | N/A                           | +                       | + (28)                |
| PS3A-P8  | -                 | -           | N/A                           | NT                      | + (28)                |
| PS3A-P9  | -                 | -           | N/A                           | -                       | + (28)                |
| PS3A-P10 | + (28)            | -           | N/A                           | NT                      | + (28)                |
| PS3A-P11 | + (28)            | -           | N/A                           | +                       | Susp (28)             |

| PS3A-P12         | -                        | -           | N/A                           | NT                      | + (28)       |
|------------------|--------------------------|-------------|-------------------------------|-------------------------|--------------|
| PS3A-P13         | -                        | -           | N/A                           | -                       | NT           |
| PS3A-P14         | -                        | -           | N/A                           | -                       | NT           |
| PS4A-P1          | + (32)                   | -           | N/A                           | -                       | + (32)       |
| PS4A-P2          | + (32)                   | -           | N/A                           | -                       | + (32)       |
| PS4A-P3          | -                        | -           | N/A                           | -                       | + (32)       |
| PS4A-P4          | -                        | -           | N/A                           | -                       | + (32)       |
| PS4A-P5          | -                        | -           | N/A                           | -                       | + (32)       |
| PS4A-P6          | + (32)                   | -           | N/A                           | -                       | + (32)       |
| PS4A-P7          | -                        | -           | N/A                           | -                       | + (32)       |
| PS5A-AF1 to AF12 | + AF1 (14)<br>+ AF5 (14) | NT          | N/A                           | + AF5; AF6; AF9         | NT           |
| LS1A             | NT                       | NT          | + (5)                         | NT                      | +(14)        |
| SP1A             | NT                       | NT          | NT                            | NT                      | -            |
| SP2A             | NT                       | NT          | NT                            | NT                      | -            |
| SP3A             | - (4)                    | NT          | NT                            | NT                      | -            |
| SP4A             | + (4)                    | NT          | NT                            | NT                      | -            |
| SP5A*            | - (21)                   | NT          | NT                            | NT                      | -            |
| SP6A             | - (5)                    | NT          | NT                            | NT                      | -            |
| SP7A             | + (5)                    | NT          | NT                            | NT                      | -            |
| SP8A             | - (15)                   | NT          | NT                            | NT                      | -            |
| SP9A*            | + (21)                   | NT          | NT                            | NT                      | -            |
| SP10A            | - (12)                   | + (3;4)     | + (4)                         | NT                      | + (14)       |
| E1B              | - (29)                   | NT          | NT                            | NT                      | -            |
| E2B              | - (29)                   | NT          | NT                            | NT                      | -            |
| L1B              | - (29)                   | -           | + (1 ; 21)                    | NT                      | + (29)       |
| Animal           | Real Time RT-PCR         |             |                               | Conventional RT-PCR     | ELISA        |
|                  | Organ pool (DEPI)        | Blood (DPI) | Oronasorectal swab pool (DPI) | Tissue culture material | Serum (DPI)  |
| L2B              | + (29)                   | -           | -                             | NT                      | + (29)       |
| W1B              | - (2)                    | NT          | NT                            | NT                      | -            |
| W2B              | - (4)                    | NT          | NT                            | NT                      | -            |
| W3B              | - (6)                    | NT          | NT                            | NT                      | -            |
| W4B              | - (15)                   | NT          | NT                            | NT                      | -            |
| W5B              | + (21)                   | -           | + (3;4)                       | NT                      | Susp (14;21) |
| W6B              | - (29)                   | -           | -                             | NT                      | + (21;28;30) |
| W7B              | - (61)                   | -           | + (21;28)                     | NT                      | + (30)       |
| W8B              | - (61)                   | NT          | NT                            | NT                      | -            |
| W9B*             | - (61)                   | -           | NT                            | NT                      | Susp (21)    |

PS: Pregnant sow; LS: Lactating sow; SP: Suckling piglet; W: Weaner; L: Lamb; E: Ewe; vv: Virus variant; \*: Negative control; \*: Negative control; NT: Not Tested; N/A: Not applicable; +: Positive; -: Negative; Susp: Suspect; DPI: Days Post Infection; DEPI: Day Euthanised Post Infection or Use.

**Table S2** Laboratory test results of group 2 animals. Only blood and oronasorectal swab pools of animals that demonstrated antibody presence on ELISA were tested on real time RT-PCR (newborn piglets were not swabbed). For blood, oronasorectal swab pools and sera, a negative result represents a collection of negative results of all the samples tested for the particular animal

| Animal   | Real Time RT-PCR  |             |                               | Conventional RT-PCR     | ELISA                        |
|----------|-------------------|-------------|-------------------------------|-------------------------|------------------------------|
|          | Organ pool (DEPI) | Blood (DPI) | Oronasorectal swab pool (DPI) | Tissue culture material | Serum (DPI)                  |
| PS1C     | -                 | N/A         | N/A                           | +                       | -                            |
| PS2C     | -                 | -           | -                             | +                       | Susp (4); + (14; 21; 28; 61) |
| PS3C     | -                 | -           | +(21)                         | -                       | +(4; 14; 21; 27)             |
| PS4C     | -                 | N/A         | N/A                           | -                       | -                            |
| PS1C-P1  | -                 | -           | N/A                           | -                       | -                            |
| PS1C-P2  | +(27)             | -           | N/A                           | +                       | -                            |
| PS1C-P3  | +(27)             | +(27)       | N/A                           | NT                      | -                            |
| PS1C-P4  | +(27)             | -           | N/A                           | +                       | -                            |
| PS1C-P5  | -(27)             | -           | N/A                           | -                       | -                            |
| PS1C-P6  | -(27)             | -           | N/A                           | -                       | -                            |
| PS1C-P7  | +(27)             | -           | N/A                           | NT                      | -                            |
| PS1C-P8  | +(27)             | -           | N/A                           | +                       | -                            |
| PS1C-P9  | -(27)             | -           | N/A                           | +                       | -                            |
| PS1C-P10 | +(27)             | -           | N/A                           | -                       | -                            |
| PS1C-P11 | +(27)             | -           | N/A                           | -                       | -                            |
| PS1C-P12 | +(27)             | NT          | N/A                           | +                       | -                            |
| PS1C-P13 | -(27)             | NT          | N/A                           | NT                      | NT                           |
| PS1C-P14 | +(27)             | NT          | N/A                           | +                       | NT                           |
| PS1C-P15 | +(27)             | NT          | N/A                           | NT                      | NT                           |
| PS1C-P16 | -                 | NT          | N/A                           | NT                      | NT                           |
| PS1C-P17 | +(27)             | NT          | N/A                           | -                       | NT                           |
| PS2C-P1  | -                 | -           | N/A                           | -                       | NT                           |
| PS2C-P2  | -                 | -           | N/A                           | -                       | NT                           |
| PS2C-P3  | -                 | -           | N/A                           | +                       | -                            |
| PS2C-P4  | +(44)             | -           | N/A                           | +                       | +(44)                        |
| PS2C-P5  | -                 | -           | N/A                           | -                       | +(44)                        |
| PS2C-P6  | +(44)             | -           | N/A                           | +                       | +(44)                        |
| PS2C-P7  | -                 | -           | N/A                           | +                       | +(44)                        |
| PS2C-P8  | +(44)             | -           | N/A                           | +                       | +(44)                        |
| Animal   | Real Time RT-PCR  |             |                               | Conventional RT-PCR     | ELISA                        |
|          | Organ pool (DEPI) | Blood (DPI) | Oronasorectal swab pool (DPI) | Tissue culture material | Serum (DPI)                  |
| PS2C-P9  | -                 | -           | N/A                           | -                       | +(44)                        |
| PS2C-P10 | -                 | -           | N/A                           | NT                      | NT                           |
| PS2C-P11 | +(44)             | -           | N/A                           | NT                      | NT                           |
| PS3C-P1  | -                 | -           | N/A                           | NT                      | +(22)                        |
| PS3C-P2  | +(22)             | -           | N/A                           | -                       | Susp (22)                    |
| PS3C-P3  | +(22)             | -           | N/A                           | -                       | +(22)                        |
| PS3C-P4  | -                 | -           | N/A                           | NT                      | Susp (22)                    |
| PS3C-P5  | +(22)             | -           | N/A                           | NT                      | -                            |
| PS3C-P6  | +(22)             | -           | N/A                           | -                       | +(22)                        |
| PS3C-P7  | +(22)             | -           | N/A                           | -                       | +(22)                        |
| PS3C-P8  | +(22)             | -           | N/A                           | +                       | +(22)                        |

|          |                   |             |                               |                     |                        |
|----------|-------------------|-------------|-------------------------------|---------------------|------------------------|
| PS3C-P9  | -                 | -           | N/A                           | NT                  | Susp (22)              |
| PS3C-P10 | -                 | -           | N/A                           | NT                  | + (22)                 |
| PS3C-P11 | + (22)            | -           | N/A                           | -                   | Susp (22)              |
| PS3C-P12 | NT                | NT          | N/A                           | +                   | NT                     |
| PS3C-P15 | NT                | NT          | N/A                           | -                   | NT                     |
| PS4C-P1  | -                 | NT          | N/A                           | NT                  | -                      |
| PS4C-SB2 | NT                | NT          | N/A                           | -                   | NT                     |
| PS4C-SB3 | -                 | NT          | N/A                           | -                   | NT                     |
| PS4C-P3  | NT                | NT          | N/A                           |                     | -                      |
| PS4C-P4  | -                 | NT          | N/A                           | NT                  | -                      |
| PS4C-P5  | + (32)            | NT          | N/A                           | +                   | -                      |
| PS4C-P6  | -                 | NT          | N/A                           | -                   | -                      |
| PS4C-P7  | -                 | NT          | N/A                           | +                   | -                      |
| PS4C-P8  | -                 | NT          | N/A                           | -                   | -                      |
| LS1C     | + (22)            | NT          | NT                            | NT                  | -                      |
| LS2C     | + (22)            | NT          | NT                            | NT                  | -                      |
| SP1C     | NT                | NT          | NT                            | NT                  | -                      |
| SP2C     | NT                | NT          | NT                            | NT                  | -                      |
| SP3C*    | - (22)            | NT          | NT                            | NT                  | -                      |
| SP4C*    | - (22)            | NT          | NT                            | NT                  | -                      |
| SP5C     | + (4)             | NT          | NT                            | NT                  | -                      |
| SP6C     | + (4)             | NT          | NT                            | NT                  | -                      |
| SP7C     | NT                | NT          | NT                            | NT                  | -                      |
| SP8C     | + (6)             | NT          | NT                            | NT                  | -                      |
| Animal   | Real Time RT-PCR  |             |                               | Conventional RT-PCR | ELISA                  |
|          | Organ pool (DEPI) | Blood (DPI) | Oronasorectal swab pool (DPI) | Organ pool (DEPI)   | Blood (DPI)            |
| SP9C     | NT                | NT          | + (6;7)                       | NT                  | Susp (1); + (14)       |
| SP10C    | - (4)             | NT          | NT                            | NT                  | -                      |
| E1D      | + (3)             | NT          | NT                            | NT                  | -                      |
| E2D      | + (3)             | NT          | NT                            | NT                  | -                      |
| L1D      | + (3)             | NT          | NT                            | NT                  | -                      |
| L2D      | + (3)             | + (2)       | -                             | NT                  | -                      |
| W1D      | NT                | NT          | NT                            | NT                  | + (3)                  |
| W2D*     | - (62)            | -           | + (5;7;14)                    | NT                  | + (14;21); Susp (28)   |
| W3D      | - (5)             | NT          | NT                            | NT                  | -                      |
| W4D      | + (14)            | -           | + (5;6;7)                     | NT                  | + (7;14)               |
| W5D      | - (22)            | -           | + (5;6;14)                    | NT                  | + (14;21)              |
| W6D      | - (30)            | + (1)       | + (4;6)                       | NT                  | + (21;28)              |
| W7D      | - (62)            | -           | -                             | NT                  | + (21;28)              |
| W8D      | - (3)             | NT          | NT                            | NT                  | -                      |
| W9D      | - (62)            | + (21)      | + (5;6)                       | NT                  | Susp (14); Pos (21;28) |

PS: Pregnant sow; LS: Lactating sow; SP: Suckling piglet; W: Weaner; L: Lamb; E: Ewe; vv: Virus variant; \*: Negative control; \*: Negative control; NT: Not Tested; N/A: Not applicable; +: Positive; -: Negative; Susp: Suspect; DPI: Days Post Infection; DEPI: Day Euthanised Post Infection or Use.

**Table S3** Real time RT-PCR and blocking ELISA results of group 3 animals. For blood, oronasorectal swab pools and sera, a negative result represents a collection of negative results of all the samples tested for the particular animal

| Animal | Real time RT-PCR  |             |                               | ELISA             |
|--------|-------------------|-------------|-------------------------------|-------------------|
|        | Organ pool (DEPI) | Blood (DPI) | Oronasorectal swab pool (DPI) | Serum (DPI)       |
| L1E♥   | - (29)            | + (29)      | + (1;3;5;7;14)                | Susp (5); + (21)  |
| L2E♥   | - (29)            | -           | + (3)                         | Susp (5); + (21)  |
| L3E♥   | - (29)            | -           | NT                            | + (29)            |
| L4E♥   | - (29)            | -           | NT                            | + (5;29)          |
| E1E    | - (29)            | NT          | NT                            | -                 |
| E2E    | - (29)            | NT          | NT                            | -                 |
| E3E    | - (29)            | NT          | NT                            | -                 |
| E4E    | - (29)            | NT          | NT                            | -                 |
| W1E*   | + (29)            | NT          | NT                            | -                 |
| W2E■   | - (29)            | + (5)       | -                             | + (14;30)         |
| W3E♥   | + (29)            | NT          | NT                            | -                 |
| W4E▲   | - (29)            | -           | + (7)                         | + (14;30)         |
| W5E■   | - (29)            | + (1)       | -                             | Susp (30)         |
| W6E▲   | - (29)            | NT          | NT                            | -                 |
| W7E*   | - (29)            | -           | -                             | Susp (14); + (30) |
| W8E♥   | - (29)            | -           | -                             | + (30)            |
| W9E♥   | - (29)            | -           | -                             | -                 |

L: lamb; E: Ewe; W: Weaner; \*: Negative control; NT: Not Tested; +: Positive; -: Negative; Susp: Suspect; DPI: Days Post Infection; ♥: Inoculated with virus mixture; ■: Infected with virus 1; ▲: Inoculated with virus 2; DEPI: Day Euthanised Post Infection or Use.

**Table S4** Comparison of results of RVFV infectivity experiments in weaners conducted in this study and that of Clarke et al., 2021

| Analyte              | Sample                       | Proportion positive (%) |                     | <i>P</i> - value                |
|----------------------|------------------------------|-------------------------|---------------------|---------------------------------|
|                      |                              | This study              | Clarke et al., 2021 |                                 |
| Antibody             | Serum/Plasma                 | 53.63 (n = 19)          | 100 (n = 6)         | 0.04<br>(95%CI: -2.6% to 67%)   |
| Virus<br>(isolation) | Organs                       | NT                      | 0 (n = 6)           | N/A                             |
|                      | Rectal swabs                 | NT                      | 0 (n = 6)           | N/A                             |
|                      | Blood/Serum                  | NT                      | 50 (n = 6)          | N/A                             |
|                      | Oronasal swabs               | NT                      | 33.33 (n = 6)       | N/A                             |
| RNA                  | Blood/Serum                  | 20 (n = 10)             | 0 (n = 6)           | 0.256<br>(95%CI: -21.6% to 51%) |
|                      | Oronasal/oronasorectal swabs | 60 (n = 10)             | 0 (n = 6)           | 0.02<br>(95%CI: -11.5% to 83%)  |
|                      | Organs                       | 11.11 (n = 18)          | NT                  | N/A                             |
| RNA                  | TC material - Serum          | NT                      | 50 (n = 6)          | N/A                             |
|                      | TC material - oronasal swabs | NT                      | 33.33 (n = 6)       | N/A                             |

TC: Tissue culture; NT: Not tested; N/A: Not applicable.
